# Supplementary material
Source: PubMed Central journal article supplement (PMC3116660)

# S1

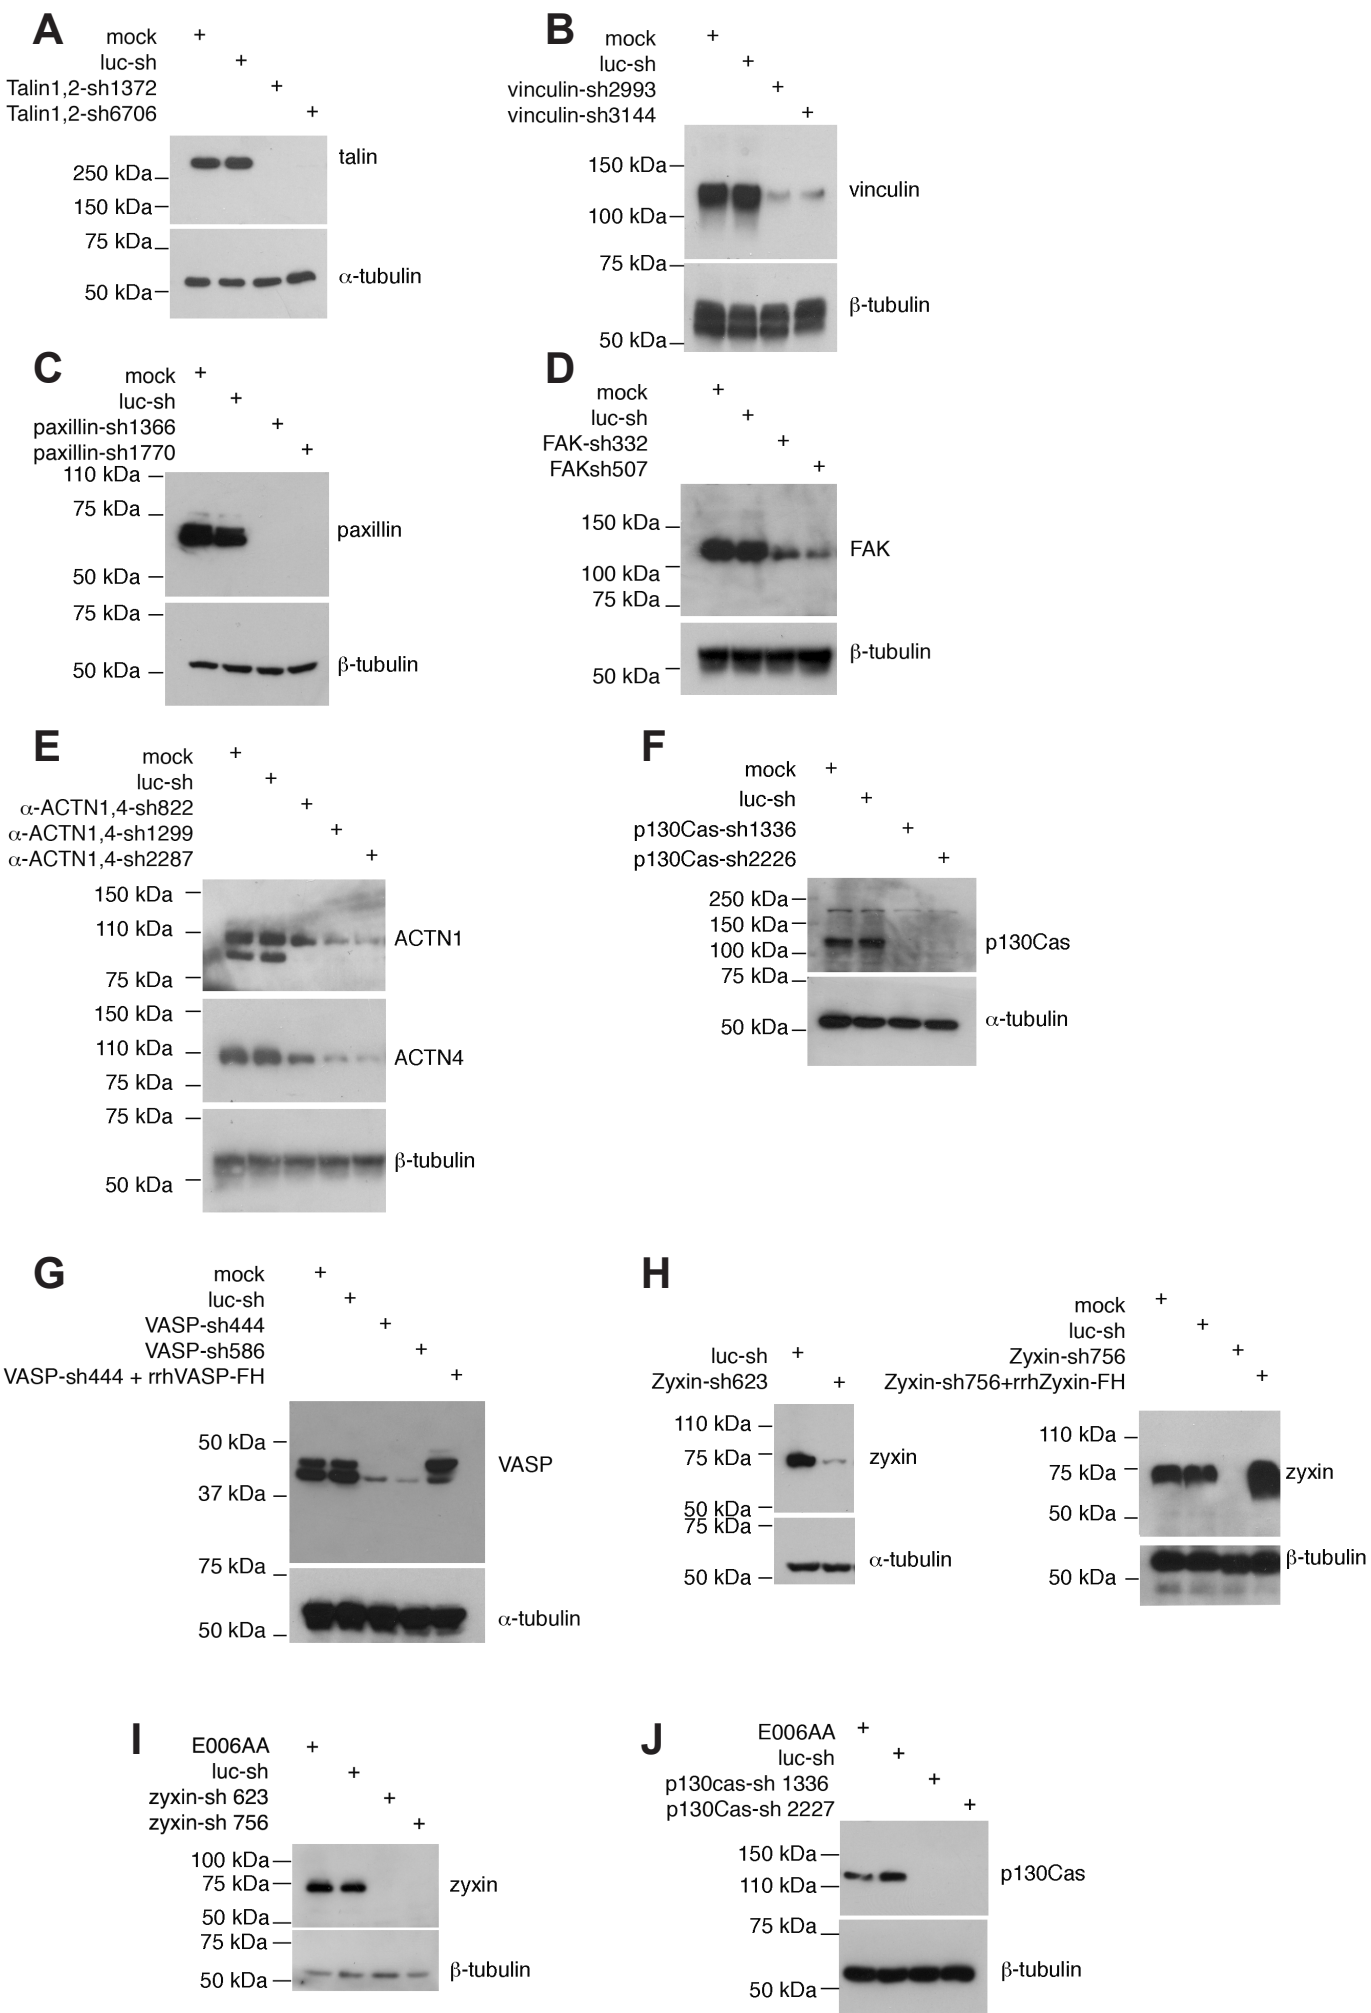

Supplement: NIHMS199348-supplement-1.pdf [file NIHMS199348-supplement-1.pdf]

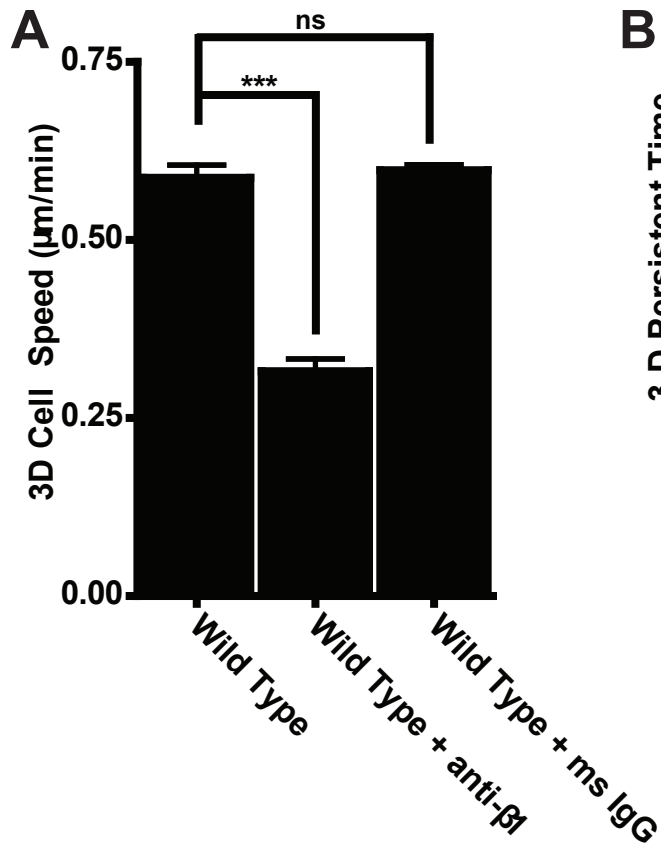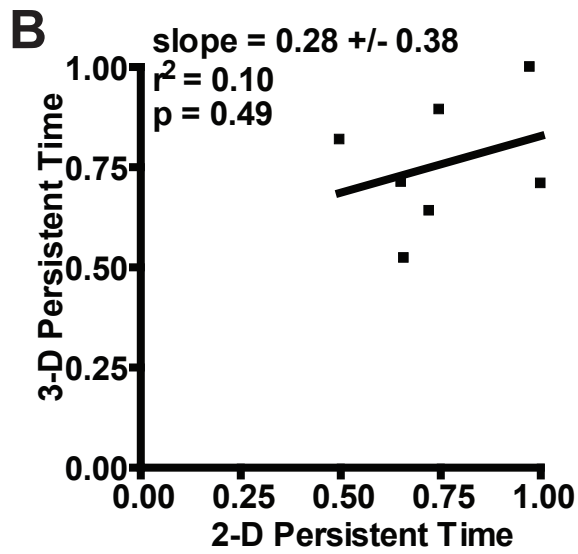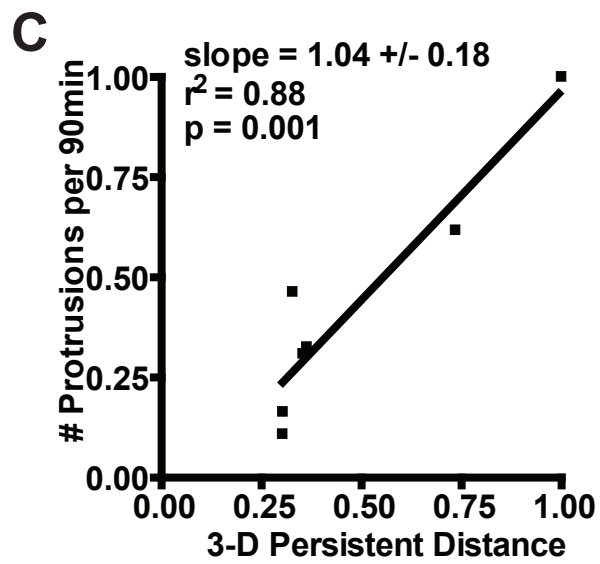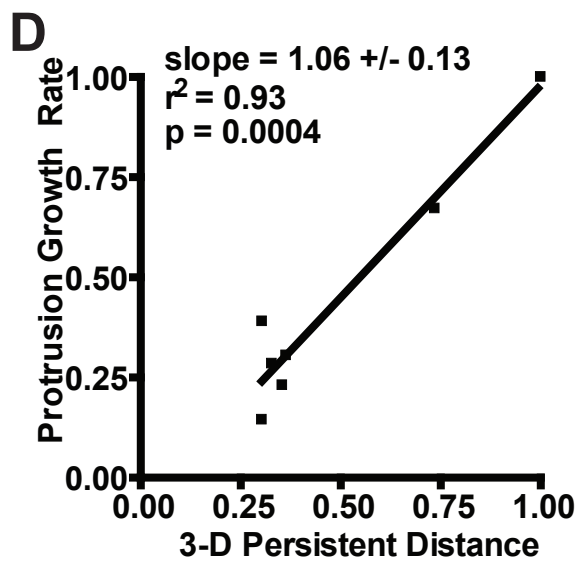

Supplement: NIHMS199348-supplement-2.pdf [file NIHMS199348-supplement-2.pdf]

S3

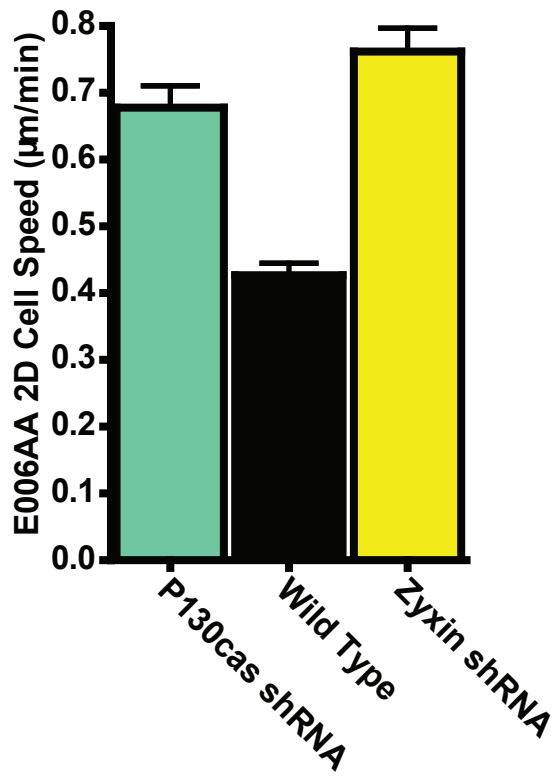

Supplement: NIHMS199348-supplement-3.pdf [file NIHMS199348-supplement-3.pdf]

**S4****A**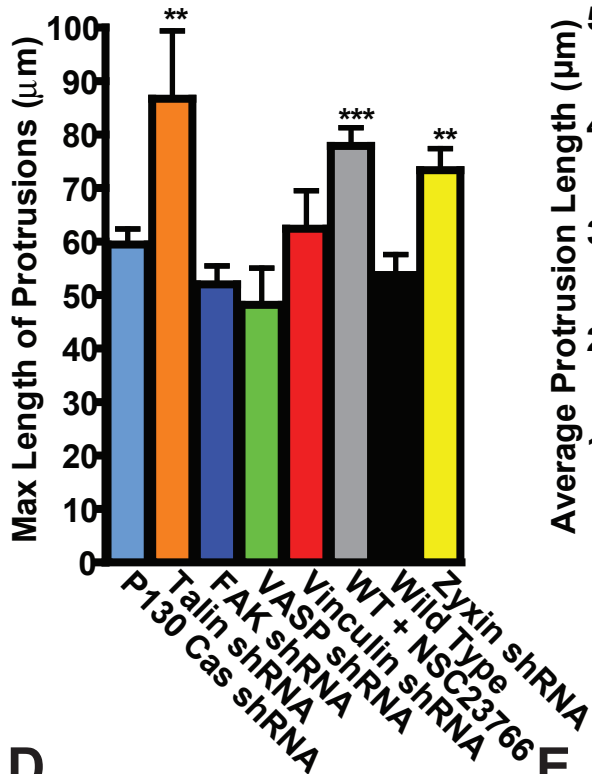**B**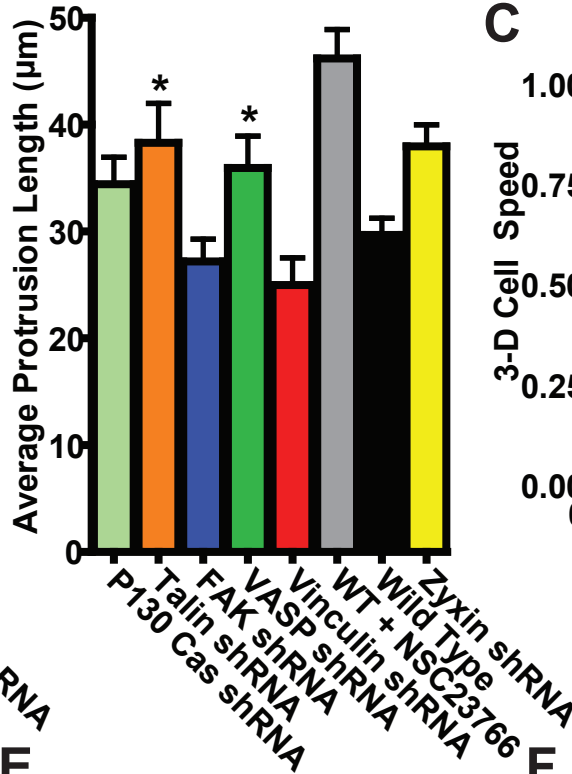**C**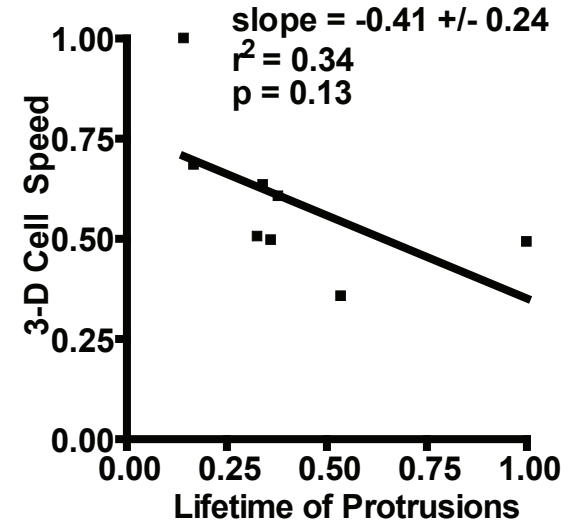**D**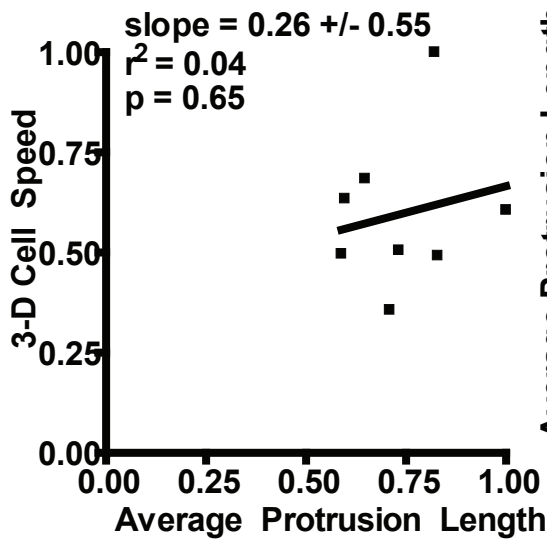**E**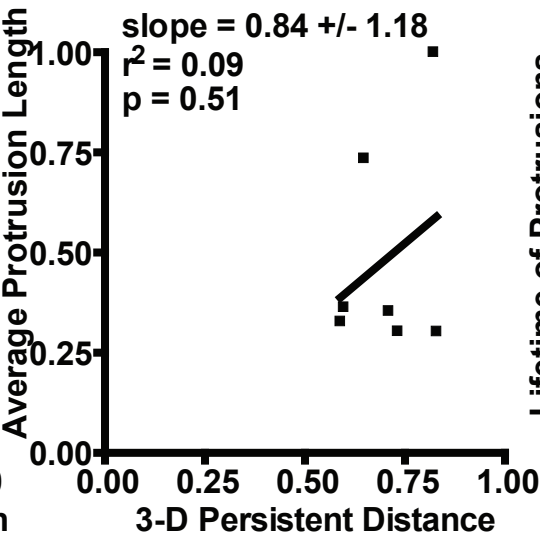**F**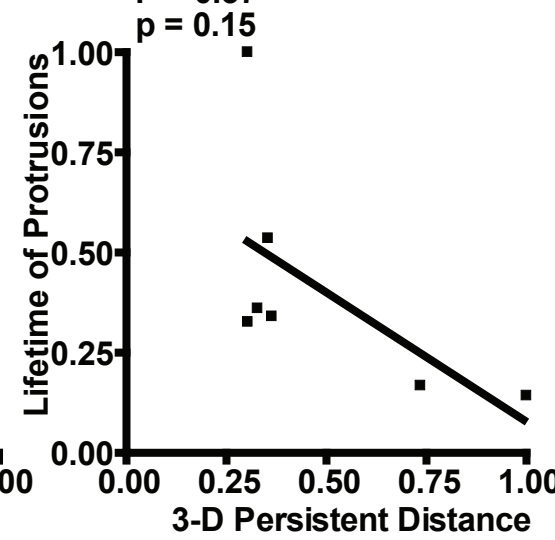

Supplement: NIHMS199348-supplement-4.pdf [file NIHMS199348-supplement-4.pdf]

# S5

## A

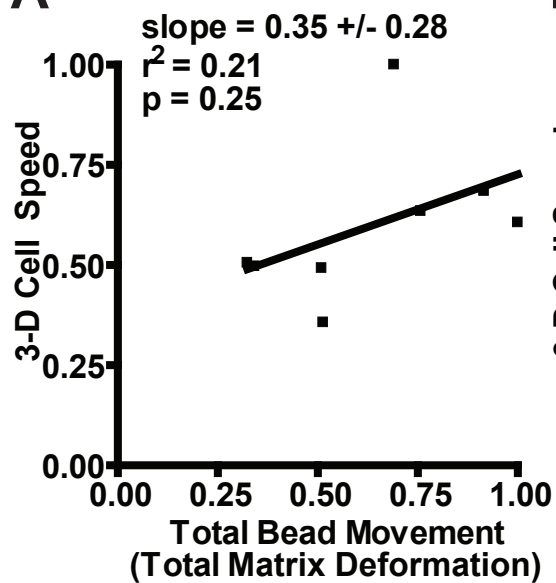

## B

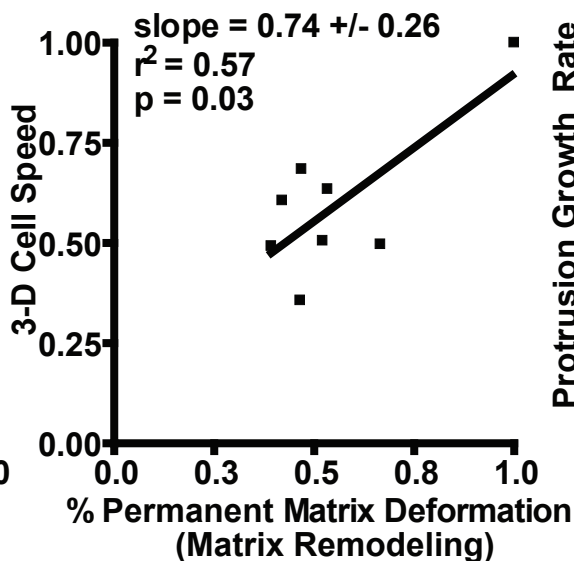

## C

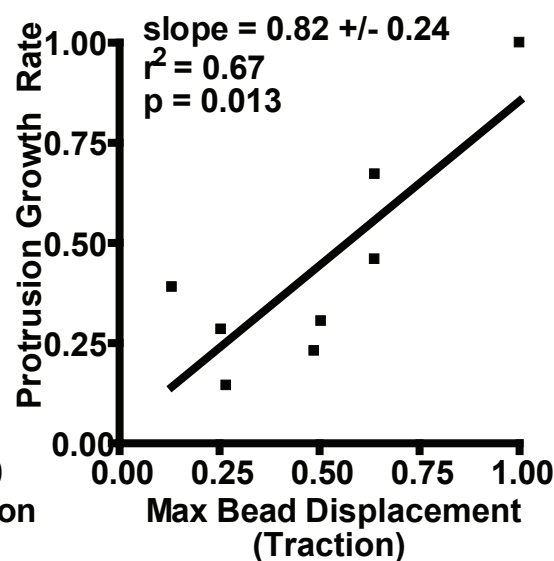

## D

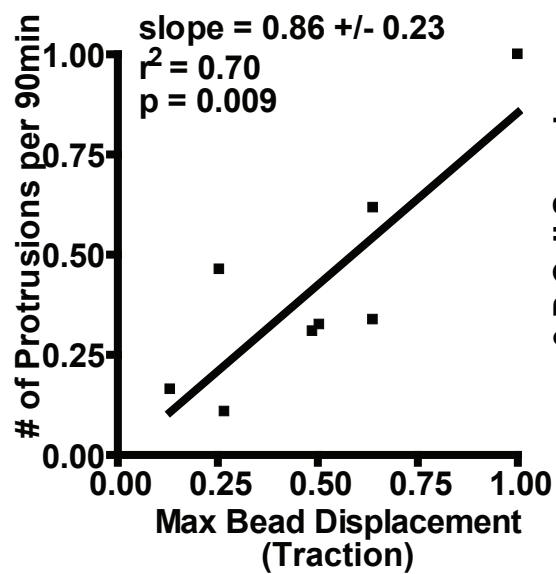

## E

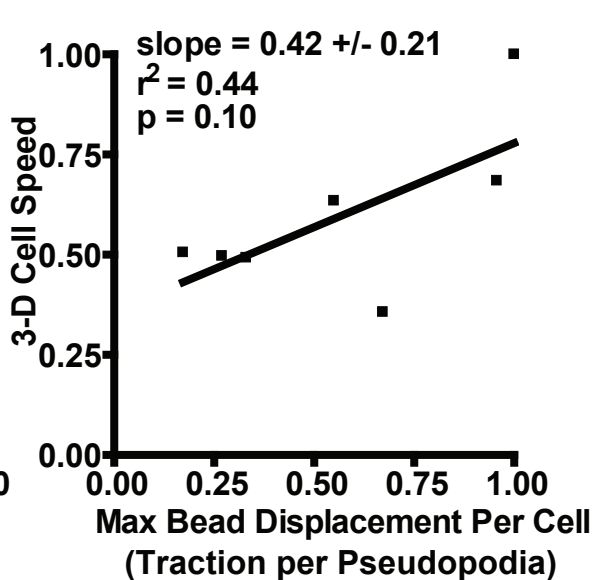

Supplement: NIHMS199348-supplement-5.pdf [file NIHMS199348-supplement-5.pdf]
